# Supplementary material
Source: Springer Nature journal article supplement (https://www.springermedizin.de/resource/supplementary/13256_2010_1603_MOESM1_ESM.pdf/9648044)

S221

R  
A

L  
P

4thk/  
TE:1.416  
TR:4.984  
MIP

I219

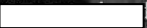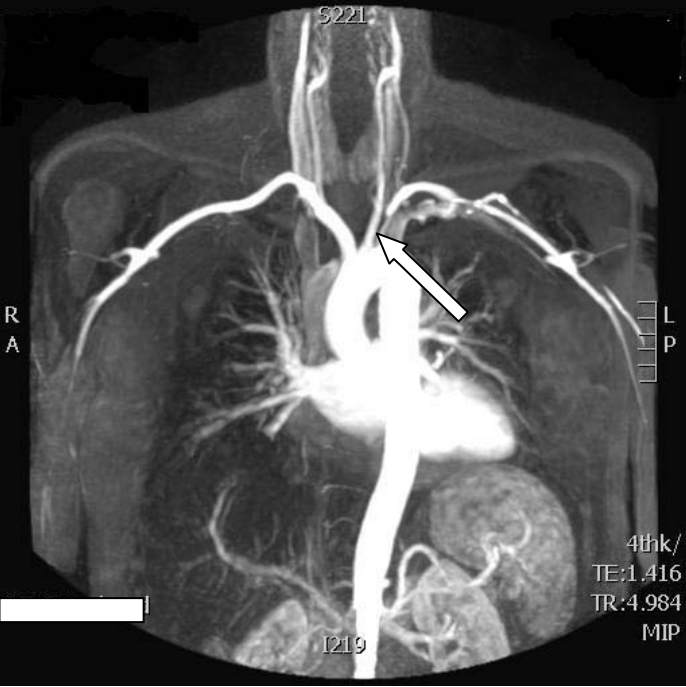

Supplement: MOESM1 [file 9648044]
